# Supplementary material for: Early detection of sepsis using artificial intelligence: a scoping review protocol
Source: Springer Nature journal article supplement (doi:10.1186/s13643-020-01561-w), 2021-01-16
Supplement: MOESM2 [file 18773656]

# Databases Covered and used Search Engines

September 2020

## 1 Web of science Platform

### 1.1 Citation Indexes

Web of Science Core Collection (Citation Indexes:

- Science Citation Index
- Social Sciences Citation Index
- Arts Humanities Citation Index
- Conference Proceedings Citation Index
- Book Citation Index
- Emerging Sources Citation Index)

BIOSIS Citation Index  
Chinese Science Citation Database  
Data Citation Index  
Russian Science Citation Index  
SciELO Citation Index  
Arabic Citation Index

### 1.2 Subject specialized and regional indexes:

Biological Abstracts, BIOSIS Previews  
CABI: CAB Abstracts and Global Health  
FSTA—the food science resource  
Inspec  
KCI—Korean Journal Database  
Medline  
Zoological Record

### **1.3 Other resources:**

Current Contents Connect  
Derwent Innovations Index (Patents)

## **2 Cochrane Library**

Cochrane Database of Systematic Reviews  
Cochrane Central Register of Controlled Trials (CENTRAL)  
Cochrane Clinical Answers  
Featured content:

- Special Collections
- Epistemonikos

## **3 PubMed**

PubMed facilitates searching across several U.S. National Library of Medicine (NLM) literature resources:  
MEDLINE  
PubMed Central (PMC)  
Bookshelf

## **4 IEEE Xplore**

## **5 ACM Digital Library**

## **6 ClinicalTrials.gov**

## **7 Scopus**

## **8 Google Scholar**
